# Supplementary material
Source: publisher figshare collection journal article supplement (https://acs.figshare.com/ndownloader/files/19985714)

## Supporting Information for Publication

### Minute-speed Biodegradation of Organophosphorus Insecticides by *Cupriavidus nantongensis* X1<sup>T</sup>

Taozhong Shi,<sup>†,1</sup> Liancheng Fang,<sup>†,1</sup> Han Qin,<sup>†</sup> Xiangwei Wu,<sup>†</sup> Qing X. Li,<sup>§,\*</sup> Rimao Hua<sup>†,\*</sup>

<sup>†</sup> Key Laboratory for Agri-Food Safety, School of Resource & Environment, Anhui Agricultural University, Hefei, Anhui 230036, China

<sup>§</sup> Department of Molecular Biosciences and Bioengineering, University of Hawaii at Manoa, 1955 East-West Road, Honolulu, HI 96822, United States

<sup>1</sup> Taozhong Shi and Liancheng Fang contribute equally to this paper.

This file includes:

**Fig S1.** Minimum inhibitory concentrations (MIC) of *p*-nitrophenol to strain X1<sup>T</sup>.

**Fig S2.** GC-TQ chromatograms of *p*-nitrophenol and metabolites at different degradation times by strain X1<sup>T</sup>.

**Fig S3.** UPLC chromatograms of isocarbophos by strain X1<sup>T</sup>. (Enlarged version)

**Fig S4.** Amplification of *opdB* gene. Line M: marker

**Fig S1.**

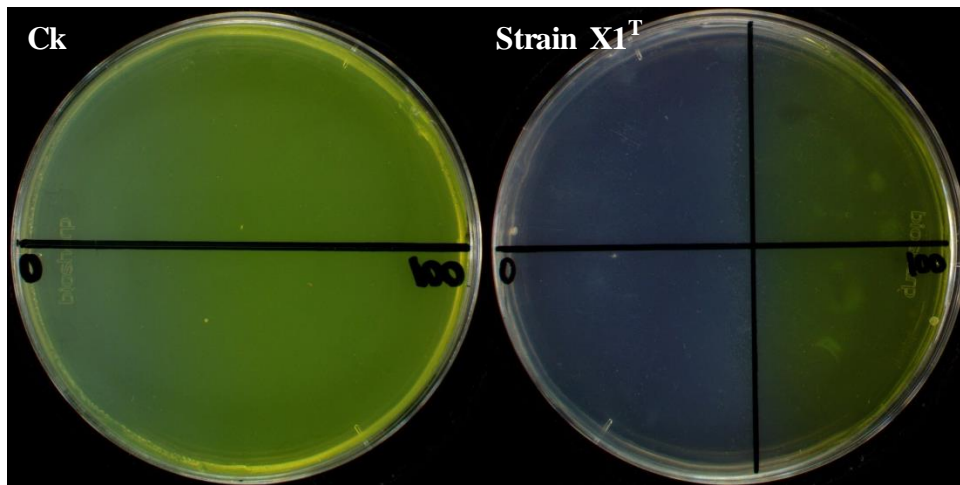

**Fig S2.**

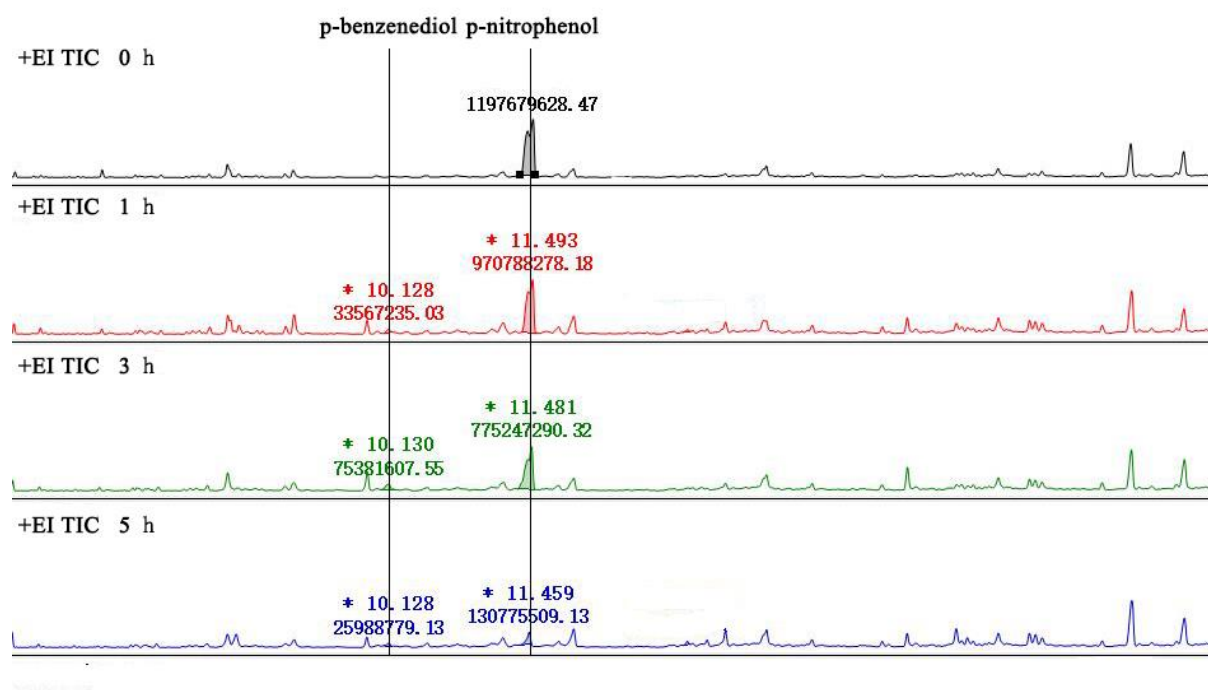

**Fig S2.**

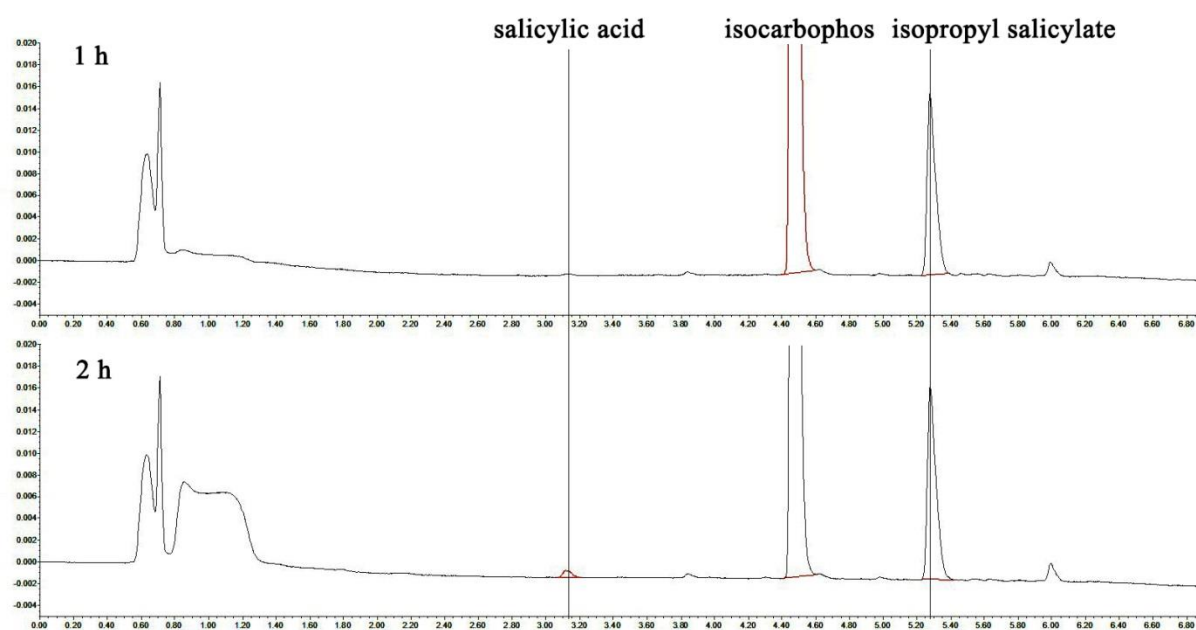

**Fig S3.**

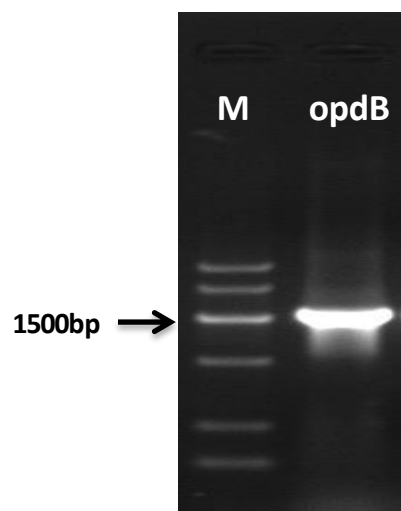

Supplement: Supplementary file 1 [file 19985714]
